# Supplementary material
Source: MDPI journal article supplement (https://www.mdpi.com/2071-1050/14/15/9597)
Supplement: s1 [file s1]

Table S1: Results of physico-chemical characterization from hemodialysis wastewater before and after treatment

| Parameters              | pH   | Conductivity<br>(mS/cm) | Salinity<br>(g/l) | COD<br>(mg/l) | Cl <sup>-</sup><br>(mg/l) | Total nitrogen<br>(mg N/l) | PO <sub>4</sub> <sup>3-</sup><br>(mg/l) | SO <sub>4</sub> <sup>2-</sup><br>(mg/l) | Mg <sup>2+</sup><br>(mg/l) | Ca <sup>2+</sup><br>(mg/l) | Na <sup>+</sup><br>(mg/l) |
|-------------------------|------|-------------------------|-------------------|---------------|---------------------------|----------------------------|-----------------------------------------|-----------------------------------------|----------------------------|----------------------------|---------------------------|
| <b>Raw HWW</b>          | 7.46 | 13.53                   | 9.11              | 262.03        | 3976                      | 143                        | 6.47                                    | 110.64                                  | 13.88                      | 21.09                      | 3757                      |
| <b>After EC process</b> | 9.15 | 15.19                   | n.d               | 0             | 3692                      | n.d                        | 0.4                                     | 49                                      | 2.3                        | 1.36                       | 1.38                      |
| <b>After EO process</b> | 8.53 | 12.84                   | n.d               | 0             | 3195                      | 15                         | n.d                                     | 43.12                                   | 1.98                       | 0.88                       | 1.01                      |
| <b>After Absorption</b> | 8.57 | 14.73                   | n.d               | 0             | 3856                      | n.d                        | 0.22                                    | n.d                                     | n.d                        | 0.26                       | n.d                       |

n.d: Not determined
